# Supplementary material for: Probiotic Bacillus subtilis Protects against α-Synuclein Aggregation in C. elegans
Source: PubMed Central journal article supplement (PMC6963774; doi:10.1016/j.celrep.2019.12.078), 2020-01-14
Supplement: mmc1.pdf [file mmc1.pdf]

Cell Reports, Volume 30

## Supplemental Information

**Probiotic *Bacillus subtilis***

**Protects against  $\alpha$ -Synuclein**

**Aggregation in *C. elegans***

**María Eugenia Goya, Feng Xue, Cristina Sampedro-Torres-Quevedo, Sofia Arnaouteli, Lourdes Riquelme-Dominguez, Andrés Romanowski, Jack Brydon, Kathryn L. Ball, Nicola R. Stanley-Wall, and Maria Doitsidou**

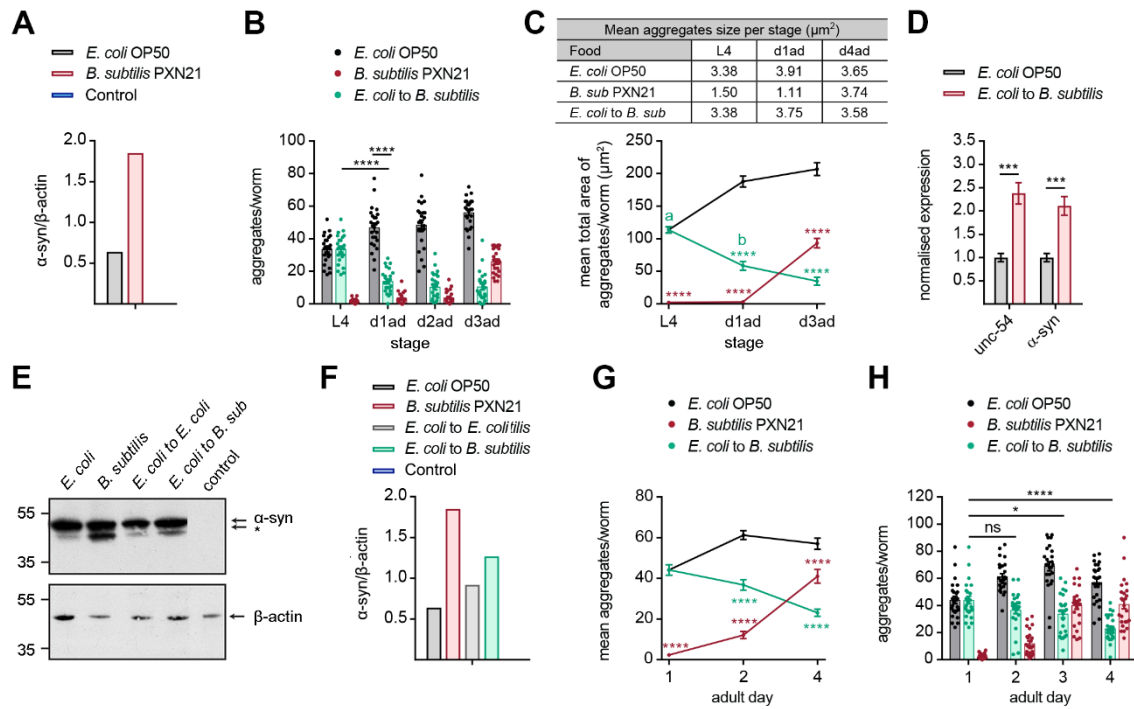

**Figure S1 | *B. subtilis* PNX21 strain prevents and reverses  $\alpha$ -synuclein aggregation in the *C. elegans* model NL5901 (*Punc-54::\alpha-syn::YFP). Related to Figure 1. (A) Normalised protein levels of  $\alpha$ -syn vs  $\beta$ -actin signals shown in Fig. 1D. (B) Quantification of  $\alpha$ -syn aggregates larger than  $1 \mu\text{m}^2$  per animal in the head region for the food-switching experiment (food switch at L4, see Fig. 1G). Most of the reversibility effect is reached 24 h after shifting to a *B. subtilis* PNX21 diet. \*\*\*\* $P < 0.0001$  vs *E. coli*; a vs b, \*\*\*\* $P < 0.0001$ ;  $n = 25$  worms per time point per condition. (C) Quantification of the total area of all aggregates larger than  $1 \mu\text{m}^2$  and the mean aggregates size per animal in the head region shown in Fig. 1G. (D) Expression levels by qRT-PCR of *unc-54* and  $\alpha$ -syn transcripts from day 1 adult worms on *E. coli* or 24 h after switching to *B. subtilis* PNX21 mixed lawns, normalized to the *E. coli* diet. Expression level of each gene in *E. coli* was taken as 1. \*\*\* $P < 0.0004$ ;  $n = 3$  per condition, with 3 technical replicates each ( $n$  represents a population of  $\sim 4000$  worms). (E) SDS/PAGE from  $\alpha$ -syn transgenic and wild type day 1 adult worms before and after the food-switching (food switch at L4, see Fig. 1G). Arrow with \* indicates  $\alpha$ -syn monomeric isoform. (F) Normalised protein levels of  $\alpha$ -syn vs  $\beta$ -actin signals shown in E. (G, H) Quantification of  $\alpha$ -syn aggregates in worms before and after food-switching at day 1 adult, from *E. coli* to *B. subtilis* PNX21. Aggregates progressively clear at 24 h, 48 h and 72 h after shifting to a *B. subtilis* PNX21 diet (H). \*\*\*\* $P < 0.0001$  vs *E. coli* (G); \* $P = 0.015$ , \*\*\*\* $P < 0.0001$  (H);  $n = 25$  worms per time point per condition. Data shown are mean  $\pm$  SEM from one representative experiment out of three with similar results, unless stated otherwise. ns: no significant differences.***

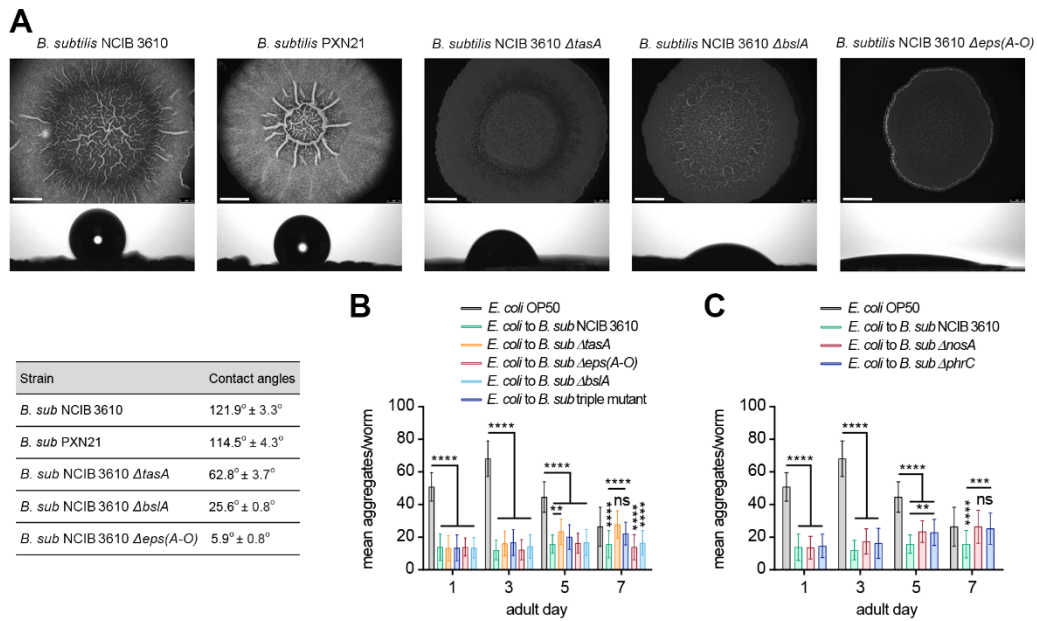

**Figure S2 | Biofilm formation and active metabolites contribute to the *B. subtilis* effect. Related to Figure 3. (A)** Biofilm formation ability of *B. subtilis* PXN21 with respect to other well characterized *B. subtilis* NCIB 3160 strains. In the upper panels, representative *B. subtilis* strains in solid MSgg biofilm-inducing medium are shown. PXN21 is able to form highly complex and elaborate biofilm structures similar to the undomesticated NCIB 3610. These structures are severely disrupted in the isogenic NCIB 3610 deletion strains *AtasA*, *AbslA*, and *Aeps(A-O)*. Hydrophobicity tests (an important assessment of biofilm function), performed by adding a drop of water on top of the biofilm structure, are shown for each strain on the lower panels of each image and quantified on the table (bottom left). Biofilms with contact angles above 90° are consider hydrophobic. Scale bars=0.5 cm. Mean ± SEM, n=25 biofilm/strain from 5 independent experiments are shown. **(B)** Average  $\alpha$ -syn aggregation of worms fed with *E. coli* or switched from *E. coli* to *B. subtilis* wild isolate NCBI 3610 or its matrix biofilm-deficient derivatives, *AtasA*, *AbslA*, *Aeps(A-O)* and the triple mutant (see Fig. 3A). \*\*\*\*P<0.0001, \*\*P=0.0049; n $\geq$ 25 worms per time point per condition. **(C)** Average  $\alpha$ -syn aggregation in worms fed with either *E. coli*, switched from *E. coli* to *B. subtilis* NCBI 3610, or the NO and CSF deficient derivatives *AnosA* and *AphrC*, respectively (see Fig. 3B). \*\*\*\*P<0.0001, \*\*P<0.01 and \*\*\*P=0.0001; n $\geq$ 25 worms per time point per condition. Data shown are mean ± SEM from one representative experiment out of three with similar results, unless stated otherwise. ns: no significant differences.

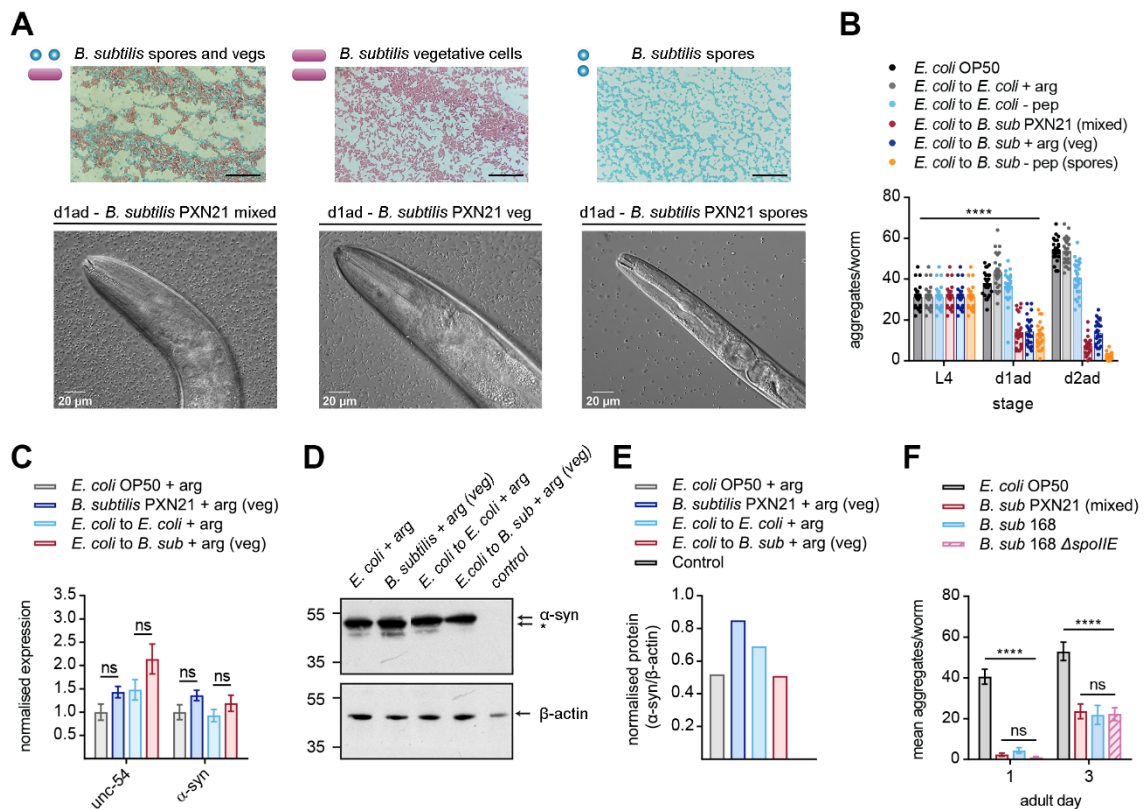

**Figure S3 | *B. subtilis* spores and vegetative cells both protect against  $\alpha$ -synuclein aggregation.**

**Related to Figure 4.** (A) Phenotypes of *B. subtilis* PXN21 tested in this work. Upper panels show Schaeffer Fulton staining of *B. subtilis* in different growing conditions. Scale bars=50  $\mu$ m. In regular NGM medium and 3 days after seeding, *B. subtilis* forms a mix of spores (blue spheres) and vegetative cells (pink rods, left). In NGM supplemented with arginine (+ arg) and only 24 h after seeding, vegetative cells are predominant (middle). The spore-only condition is achieved by using a minimal NGM medium without peptone (- pep) and a short drying time (24 h) to prevent germination (upper right). Day 1 adult  $\alpha$ -syn transgenic worms (fed from L1) with their corresponding diets are shown at the bottom. (B) Quantification of  $\alpha$ -syn aggregates per animal in the head region for the food-switching experiment from *E. coli* to different *B. subtilis* PXN21 diets (see Fig. 4C). Most of the reversibility effect is reached only 24 h after shifting to any of the *B. subtilis* diets. \*\*\*\* $P < 0.0001$ ;  $n = 25$  worms per time point per condition. (C) Expression levels by qRT-PCR of *unc-54* and  $\alpha$ -syn transcripts from day 1 adult worms grown continuously on *E. coli* or *B. subtilis* PXN21 vegetative cells and after the switching to *B. subtilis* vegetative cells. Expression level of each gene was normalised to *E. coli* levels, which was taken as 1.  $n = 3$  per condition, with 3 technical replicates each ( $n$  represents a population of  $\sim 4000$  worms). (D) SDS/PAGE from  $\alpha$ -syn transgenic and wild type day 1 adult worms fed on a vegetative *B. subtilis* diet from L1 or L4, compared to *E. coli* (food switch at L4, expression levels shown in D). Arrow with \* indicates  $\alpha$ -syn monomeric isoform. (E) Normalised quantification of protein levels of  $\alpha$ -syn vs  $\beta$ -actin signals shown in D. (F) Average number of  $\alpha$ -syn aggregates in worms grown on *E. coli*, *B. subtilis* PXN21, *B. subtilis* 168, and its derivative *AspoIIE*. As shown in Fig. 4D for pure vegetative cells, in mixed lawns, wild type and *AspoIIE* *B. subtilis* 168 strains both protect from  $\alpha$ -syn aggregation similarly to the PXN21 strain.  $n = 50$  worms per time point per condition. Data shown are mean  $\pm$  SEM from one representative experiment out of three with similar results, unless stated otherwise. ns: no significant differences.

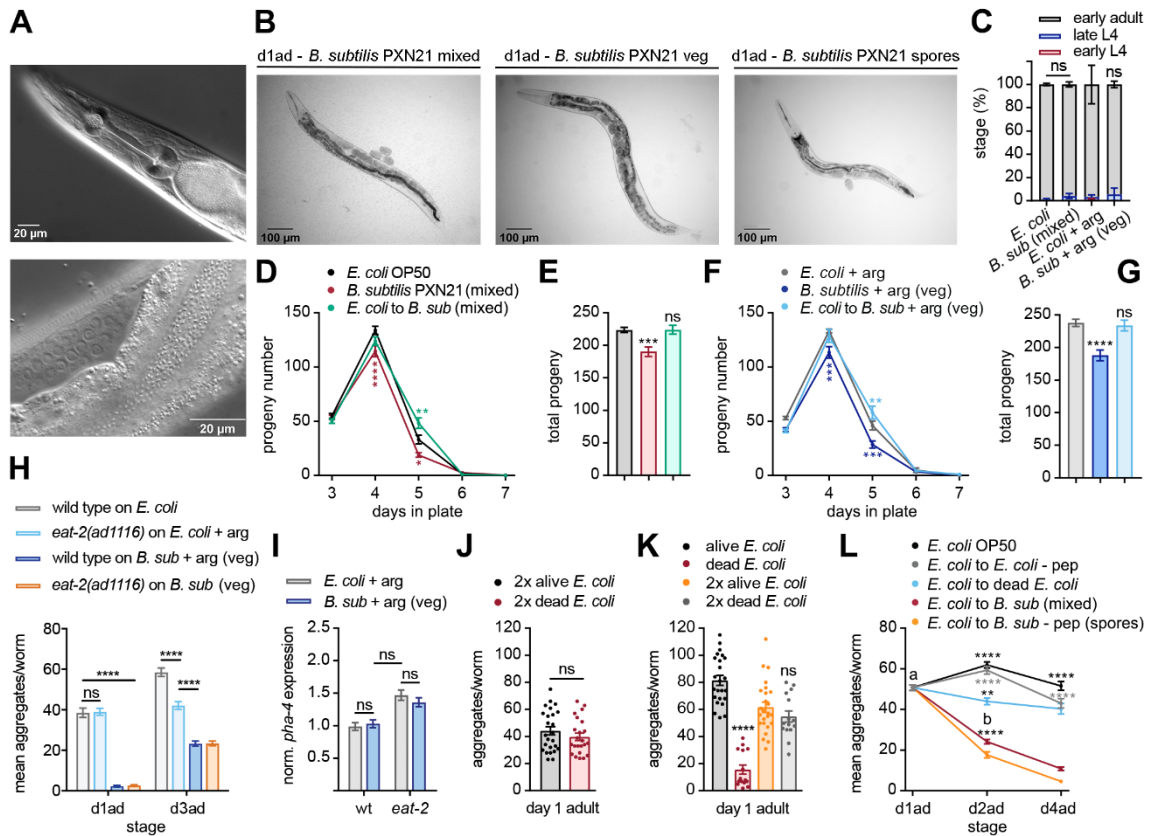

**Figure S4 | *B. subtilis* reduces  $\alpha$ -synuclein aggregation through dietary restriction dependent and independent mechanisms. Related to Figure 5. (A)** Undigested spores visible in the gut of day 1 adult  $\alpha$ -syn transgenic worms fed on *B. subtilis* PNX21 mixed cell-lawns (Nomarski images). **(B)** Day 1 adult worms grown on a *B. subtilis* PNX21 spores-only diet from L1 larval stage show severe signs of DR (strong developmental delay, very few eggs, and small size) (right) in comparison with animals fed on a mixed (left) or vegetative exclusive diet (middle). **(C)** Developmental stage at 60 h of  $\alpha$ -syn-expressing worms grown on *E. coli* or *B. subtilis* mixed-cell lawns or vegetative cells (nearly 100% of worms have reached adult stage by 60 h).  $n \geq 100$  worms per condition from two biological replicates are shown. **(D-G)** Quantification of brood size from L4 stage by day **(D, F)**, or as total number **(E, G)**, of worms fed with the different diets. **(D, F)** \* $P=0.0113$ , \*\* $P=0.0019$ , \*\*\*\* $P<0.0001$ . **(E, G)** \*\*\* $P=0.0009$ , \*\*\*\* $P=0.0001$ .  $n \geq 34$  worms per condition from two biological replicates are shown. **(H)** Average number of  $\alpha$ -syn aggregates in wild type or *eat-2(ad456)* worms grown on *E. coli* or vegetative *B. subtilis* lawns. Note that *eat-2* mutant worms grown on *E. coli* supplemented with arginine no longer show reduced levels of aggregation in day 1 adults compared to wild type. \*\*\*\* $P<0.0001$ ;  $n=50$  worms per time point per condition from two biological replicates are shown. **(I)** *pha-4* expression levels quantified by qRT-PCR and normalized to *E. coli* levels of worms grown on the diet conditions shown in **H**. *eat-2* or wild type worms grown on arginine supplemented plates show no *pha-4* upregulation in either bacterial diet compared to *E. coli*. The *pha-4* expression level in worms fed with *E. coli* was taken as 1.  $n=3$  per condition, with 3 technical replicates each ( $n$  represents a population of  $\sim 4000$  worms). **(J)** Quantification of  $\alpha$ -syn aggregates in day 1 adult worms fed on 2x concentrated, alive or UV-killed *E. coli*, 48h after seeding. \*\*\*\* $P<0.0001$ ;  $n=25$  worms per condition. **(K)** Quantification of  $\alpha$ -syn aggregates in day 1 adult worms fed on different concentrations of alive or UV-killed *E. coli*, 24 h after seeding. \*\*\*\* $P<0.0001$ ,

n $\geq$ 15 worms per condition. Worms grown on 2x concentrated UV-killed *E. coli* show no further reduction in aggregation compared to the diluted UV-killed, indicating that the protective effect of the less concentrated UV-killed *E. coli* is not due to reduced pathogenicity but due to dietary restriction. (L) Average  $\alpha$ -syn aggregates of worms before and after day 1 adult switching to regular or dietary restriction inducing conditions. \*\*\*\*P<0.0001 indicates comparison of each diet vs its respective *E. coli* control; a vs b, \*\*P=0.0026 for *E. coli* to UV-killed *E. coli* vs *E. coli*; \*\*\*\*P=0.0001 for *E. coli* to *B. subtilis* vs *E. coli*; n=25 worms per time point per condition. Data shown are mean  $\pm$  SEM from one representative experiment out of three with similar results, unless stated otherwise. ns: no significant differences.

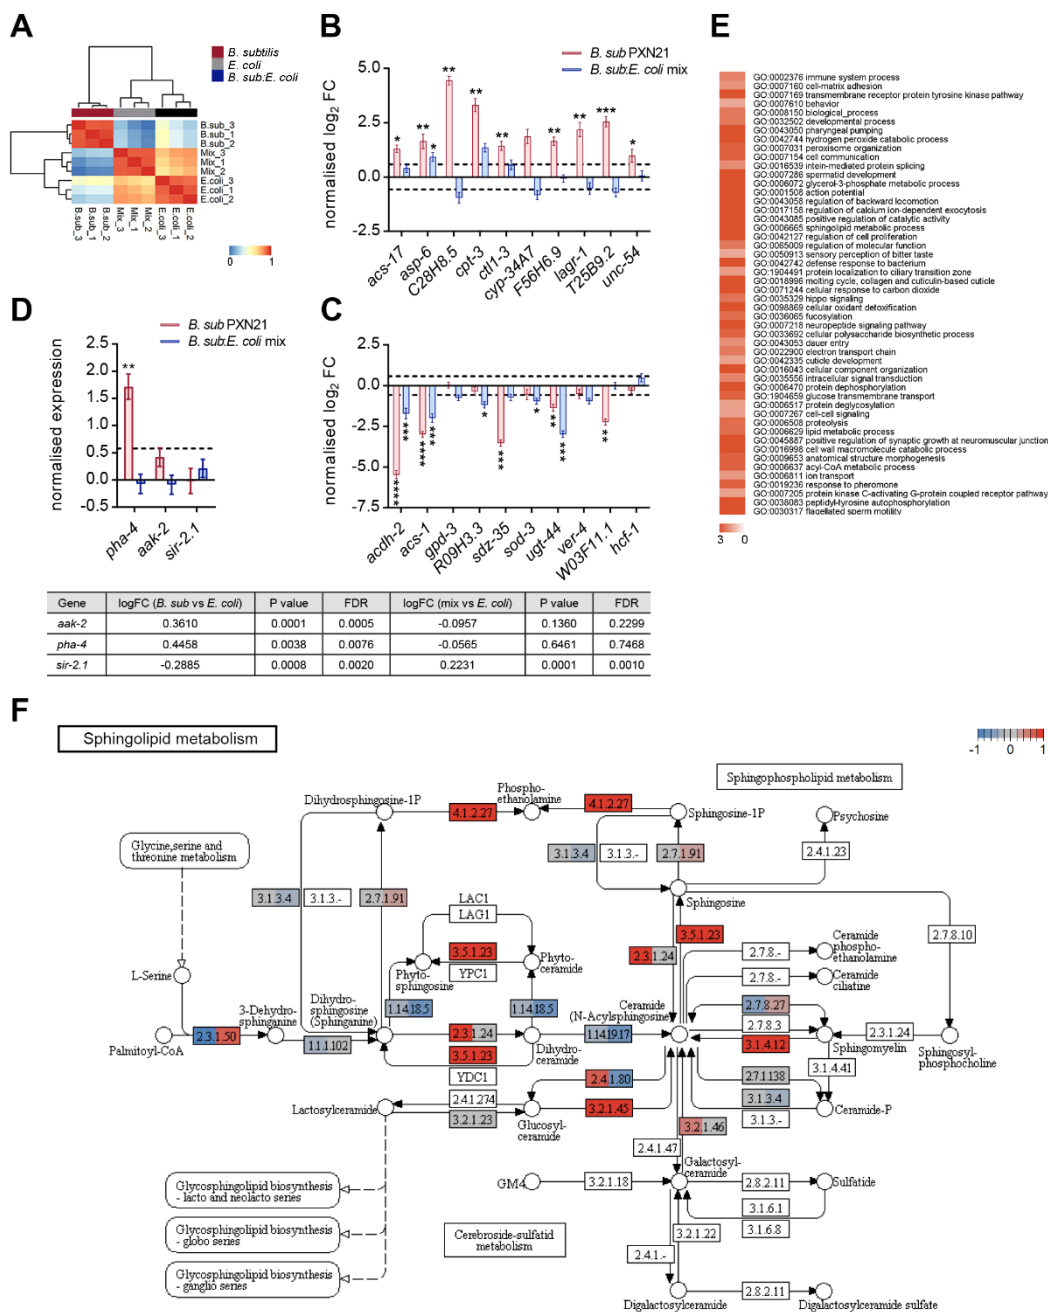

**Figure S5 | *B. subtilis* protects against  $\alpha$ -synuclein aggregation by changing the sphingolipid metabolism in the host. Related to Figure 7. (A) Heatmap showing the hierarchical clustering of samples by normalised expression values for all samples, generated by pheatmap. The 1:1 mixture of *B. subtilis* PXN21: *E. coli* OP50 shows a gene expression profile closer to *E. coli* than *B. subtilis*. (B, C) Normalised log<sub>2</sub> fold-change expression levels of 10 random upregulated (B) and downregulated (C) genes from the RNAseq by qRT-PCR from  $\alpha$ -syn-expressing young adult worms (approx. 50-52 h after hatching). Expression level of each gene in worms fed with *E. coli* was taken as 1. Dashed lines indicate the 1.5-fold change threshold (log<sub>2</sub> FC 0.58 and -0.58). \*P<0.05, \*\*P<0.01 and \*\*\*P<0.001; n=3 per condition, with 3 technical replicates each (n represents a population of ~4000 worms). (D) Normalised expression levels, as quantified by qRT-PCR, for a selection of dietary restriction transcription factors from young adult worms. Expression level of each gene in worms fed with *E. coli* was taken as 1. The bottom table shows the extracted values from the RNAseq analysis. \*\*P=0.034; n=3 per condition, with 3**

technical replicates each (n represents a population of ~4000 worms). (E) Summary of the top 50 non-redundant BP GO terms of *B. subtilis*:*E. coli* mix vs *E. coli* by log<sub>10</sub> P value. (F) Visualization of *B. subtilis* and *B. subtilis*: *E. coli* mix vs *E. coli* beta scores over the sphingolipid pathway generated by Pathview. The left and right portions of a gene box represent *B. subtilis* and *B. subtilis*:*E. coli* beta scores, respectively. Red indicates a positive beta score, blue indicates a negative beta score, and grey marks genes that are neither positively nor negatively selected. White gene boxes correspond to genes that have not been found in the *C. elegans* genome. Data shown are mean ± SEM from one representative experiment out of three with similar results, unless stated otherwise. ns: no significant differences.



**Table S9. | Oligonucleotides used in this study. Related to the STAR Methods.**

| <b>PCR genotyping of <i>C. elegans</i> mutants</b> |                        |
|----------------------------------------------------|------------------------|
| <b>Primer name</b>                                 | <b>Primer sequence</b> |
| <i>daf16(mu86)</i> Fw1                             | TCCGTCACAATCTGTCTCTTCA |
| <i>daf16(mu86)</i> Rv1                             | AAGTGTTCGAGTGAAGGGAGC  |
| <i>daf16(mu86)</i> Fw2                             | CGACAAGACAGGCGGTATCC   |
| <i>daf16(mu86)</i> Rv2                             | TATCCTCTTCTTGGCTCCGC   |
| <i>daf2(e1370)</i> Fw                              | GAGTCGCTCAAGTTTTGCCAT  |
| <i>daf2(e1370)</i> Rv                              | CTCGACGTTCTCAACATCCG   |
| <i>hsf-1(sy441)</i> Fw                             | CCGCAACAAGACTATTCGGG   |
| <i>hsf-1(sy441)</i> Rv                             | ACAAATCCTCGGCTCCATCA   |
| <i>eat-2(ad465)</i> Fw                             | TATGACCCAGTAGAACGGCC   |
| <i>eat-2(ad465)</i> Rv                             | TGGAAGTAGTTGGTGGAGGG   |
| <i>lagr-1(gk331)</i> Fw                            | AGGTGTTCGGAGGTCGATG    |
| <i>lagr-1(gk331)</i> Rv                            | AGTACCCGAATCGTTCTGG    |
| <i>sptl-3(ok1927)</i> Fw1                          | AGGTTCTACAACATGGGTGG   |
| <i>sptl-3(ok1927)</i> Rv1                          | GTTCCAGCAGAGTATCGACG   |
| <i>sptl-3(ok1927)</i> Fw2                          | CTTCTCGCATCGATCTGGAG   |
| <i>sptl-3(ok1927)</i> Rv2                          | TTGGGCTAACTCCACACAAC   |
| <i>asm-3(ok1744)</i> Fw1                           | ACGACCCGGAGATTAGTAGG   |
| <i>asm-3(ok1744)</i> Fw1                           | GACTTCGCGCGTAATTGAAG   |
| <i>asm-3(ok1744)</i> Fw2                           | TGTGGACCCCATCAATTGTG   |
| <i>asm-3(ok1744)</i> Rv2                           | GGGACACGGTGTGGTATAAC   |

| <b>PCR genotyping of bacterial mutants</b> |                        |
|--------------------------------------------|------------------------|
| <b>Primer name</b>                         | <b>Primer sequence</b> |
| Universal16S-27Fseq-Fw                     | AGAGTTTGATCMTGGCTCAG   |
| Universal16S-907Rseq-Rv                    | CCGTCAATTCMTTTRAGTTT   |
| UP2- <i>B. subtilis</i> 168 library Fw     | GAGGGAGGAAAGGCAGGA     |
| UP3- <i>B. subtilis</i> 168 library-Rv     | CGCCGTATCTGTGCTCTC     |
| <i>SpoIIIE-B. subtilis</i> 168 Fw          | CGAAGATTTCTTTGGTATTG   |
| <i>SpoIIIE-B. subtilis</i> 168 Rv          | AATGTCCGTTGTTACATTCA   |
| <i>tasA-B. subtilis</i> NCIB3610 Fw1       | GGAAACAGATACAAAGGACAGC |
| <i>tasA-B. subtilis</i> NCIB3610 Rv1       | CATCGAGACGGCCAGTATATG  |
| <i>tasA-B. subtilis</i> NCIB3610 Rv2       | TCTTCTGGAGATGTATTGCTGC |
| <i>eps(A-O)-B. subtilis</i> NCIB3610 Fw    | TCATTAACAGAAAGGGGCGC   |
| <i>eps(A-O)-B. subtilis</i> NCIB3610 Rv1   | AACACTAGTGCAGGACCAG    |
| <i>eps(A-O)-B. subtilis</i> NCIB3610 Rv2   | TTCCGAAGCCTTCGCCTC     |
| <i>bslA- B. subtilis</i> NCIB3610 Fw       | GTAAAGCAGAAAACGCCTGG   |
| <i>bslA- B. subtilis</i> NCIB3610 Rv1      | GTTCCCCGTTTCGTGTTTG    |
| <i>bslA- B. subtilis</i> NCIB3610 Rv2      | TCTGTGTTGTACGCAAGGC    |
| <i>phrC-B. subtilis</i> NCIB3610 Fw        | TCGAACGATGTTTCCAGTAC   |
| <i>phrC-B. subtilis</i> NCIB3610 Rv        | CTTGATCATTGTGGGAACTGC  |
| <i>nosA-B. subtilis</i> NCIB3610 Fw        | GTTTTCCAGGAAGTTGCAGA   |
| <i>nosA-B. subtilis</i> NCIB3610 Rv        | TGGCGGTTTCAATATGGTGA   |

| Quantitative real time PCR (qRT-PCR) |                           |
|--------------------------------------|---------------------------|
| Primer name                          | Primer sequence           |
| <i>cdc-42</i> Fw                     | CTGCTGGACAGGAAGATTACG     |
| <i>cdc-42</i> Rv                     | CTCGGACATTCTCGAATGAAG     |
| <i>F25B5.5</i> Fw                    | GAAAGCAGTGTTTCGACAATTCG   |
| <i>F25B5.5</i> Rv                    | CCTATGAGTTGCGCTTTCAATG    |
| <i>unc-54</i> Fw                     | AAGACCCAGAAGAAGCAGGTTG    |
| <i>unc-54</i> Rv                     | GATCGCATCTTTGAGAGGGGAGT   |
| <i>alfasyn</i> Fw                    | ATGTAGGCTCCAAAACCAAGGA    |
| <i>alfasyn</i> Rv                    | TGCTCCTCCAACATTTGTCACT    |
| <i>pha-4</i> Fw                      | CGGCTGTTAATCACAGTCAACC    |
| <i>pha-4</i> Rv                      | GGTAAGGAGACGCGTATTGACC    |
| <i>sir-2.1</i> Fw                    | GTTTCGTCTTGCTCATCAAATGC   |
| <i>sir-2.1</i> Rv                    | GCTCGTTGCAAGTCCAGATGTA    |
| <i>aak-2</i> Fw                      | GAGGCGAGTATTGAGAAAATGG    |
| <i>aak-2</i> Rv                      | AGTCTGGGAAAGCTTAGCTCCT    |
| <i>acs-17</i> Fw                     | GTAGAGGCATTGCAAAGGAGT     |
| <i>acs-17</i> Rv                     | TTCTTTTGAGCTTCAAGGCTTC    |
| <i>asp-6</i> Fw                      | GATTCGGACCATCATGGATTCT    |
| <i>asp-6</i> Rv                      | CGAATCCCATTCTCTTGTTC      |
| <i>C28H8.5</i> Fw                    | CCGAATCAAGTGAAGTTTAGGC    |
| <i>C28H8.5</i> Rv                    | TCACGGAACATAATTGGAACAG    |
| <i>cpt-3</i> Fw                      | GTACAATAGCCCGTTCCTTGAC    |
| <i>cpt-3</i> Rv                      | CAATGGAGTTTGTTCATGTTGG    |
| <i>ctl1-3</i> Fw                     | CGACTGGAGATGTTGATCGTTA    |
| <i>ctl1-3</i> Rv                     | AGCACTTTCTCCAGAACTGAC     |
| <i>cyp-34A7</i> Fw                   | GACGAGGAAACGTTCAAAAATC    |
| <i>cyp-34A7</i> Rv                   | TCAAATACAGCTCAGCTTTTGC    |
| <i>F56H6.9</i> Fw                    | CATGCAGCTATCTCTGGGTAGA    |
| <i>F56H6.9</i> Rv                    | TGCACAATATGTTTTCTGTCC     |
| <i>lagr-1</i> Fw                     | GACAATCGTGAATGGGACACAA    |
| <i>lagr-1</i> Rv                     | GTTCTTCGGTTTAAGATGGCAC    |
| <i>T25B9.2</i> Fw                    | GCTGGATCTTCAAATGGTTATCCGC |
| <i>T25B9.2</i> Rv                    | CAATACTAAACACAGCCGCTGTA   |
| <i>acdh-2</i> Fw                     | GGATCAAATGGGGAATCAGTA     |
| <i>acdh-2</i> Rv                     | GATCTCGATCCACAATGAAACA    |
| <i>acs-11</i> Fw                     | GATATTAAGGCTTGGTGCAAGG    |
| <i>acs-11</i> Rv                     | CACTTTTCCAGTCACTGTCAGC    |
| <i>gpd-3</i> Fw                      | CACACTTTGTCAAGCTCGTCTC    |
| <i>gpd-3</i> Rv                      | TAGGCCTTGGTAGCAATGTAGG    |
| <i>R09H3.3</i> Fw                    | CAACTCTCAGCCATCGTACCAC    |
| <i>R09H3.3</i> Rv                    | GTCGGTTTCTGTTGGTCTCTC     |
| <i>sdz-35</i> Fw                     | ACGAAACAATCCAACAAAATCC    |
| <i>sdz-35</i> Rv                     | TATCCTCCTCCAACCTTTTCAA    |
| <i>sod-3</i> Fw                      | ACCTTCAAAGGAGCTGATGGAC    |

|                    |                        |
|--------------------|------------------------|
| <i>sod-3</i> Rv    | AGCCTTGAACCGCAATAGTGAT |
| <i>ugt-44</i> Fw   | AGATTTGGAAAACCACATGGAC |
| <i>ugt-44</i> Rv   | GCTCTTAGAACCTTCGAAACGA |
| <i>ver-4</i> Fw    | ACG TTCACACAAAATCGGATG |
| <i>ver-4</i> Rv    | TCAAATACAGCTCAGCTTTTGC |
| <i>W03F11.1</i> Fw | CAACGTAGCTGCGGAGAAG    |
| <i>W03F11.1</i> Rv | TTAACCTCATTGGGTGGGTAGG |
| <i>hcf-1</i> Fw    | ATTGCTGCAAGAAATGAAAAGG |
| <i>hcf-1</i> Rv    | AAACGAGCTCTCTTTTGCTGAC |
